# Supplementary material for: Genetic interactions and transcriptomics implicate fission yeast CTD prolyl isomerase Pin1 as an agent of RNA 3′ processing and transcription termination that functions via its effects on CTD phosphatase Ssu72
Source: PubMed Central journal article supplement — Nucleic Acids Res. 2020 Apr 13;48(9):4811–26. doi: 10.1093/nar/gkaa212 (PMC7229847; doi:10.1093/nar/gkaa212), 2020-04-13
Supplement: gkaa212_supplemental_file.pdf [file gkaa212_supplemental_file.pdf]

Supplemental Material

**Genetic interactions and transcriptomics implicate fission yeast CTD prolyl isomerase Pin1 as an agent of RNA 3' processing and transcription termination that functions via its effects on CTD phosphatase Ssu72**

Ana M. Sanchez, Angad Garg, Stewart Shuman, and Beate Schwer

Supplemental Figures S1, S2, S3, S4, S5, S6, and S7

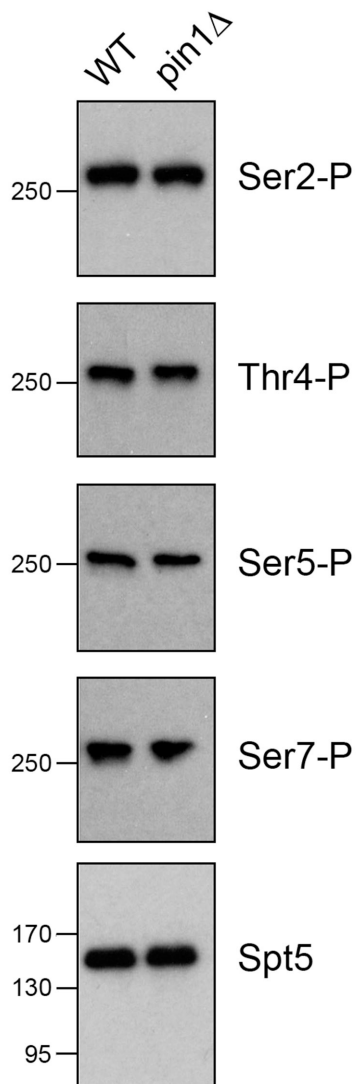

Figure S1. Ablation of Pin1 does not affect CTD serine/threonine phosphorylation globally. Whole-cell extracts from *pin1*<sup>+</sup> (WT) and *pin1* $\Delta$  strains growing logarithmically at 30°C were resolved by SDS-PAGE and subjected to Western blotting with the indicated polyclonal CTD phospho-specific antibodies and with a polyclonal antibody against transcription factor Spt5 (as a loading control). The positions and sizes (in kilodaltons) of marker polypeptides are indicated at left.

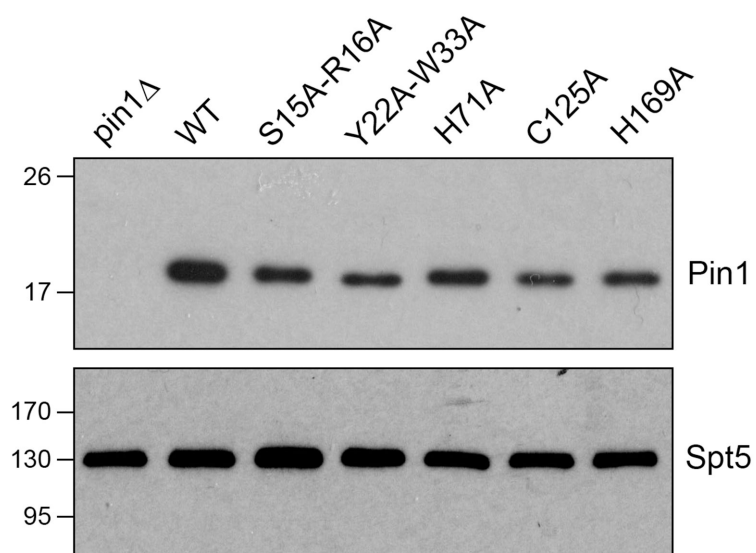

Figure S2. Western blot of Pin1 mutants. Whole-cell extracts from *pin1Δ*, *pin1*-WT, and the indicated *pin1-Ala* strains growing logarithmically at 30°C were resolved by SDS-PAGE and subjected to Western blotting with polyclonal Pin1 and Spt5 antibodies. The positions and sizes (in kilodaltons) of marker polypeptides are indicated at left.

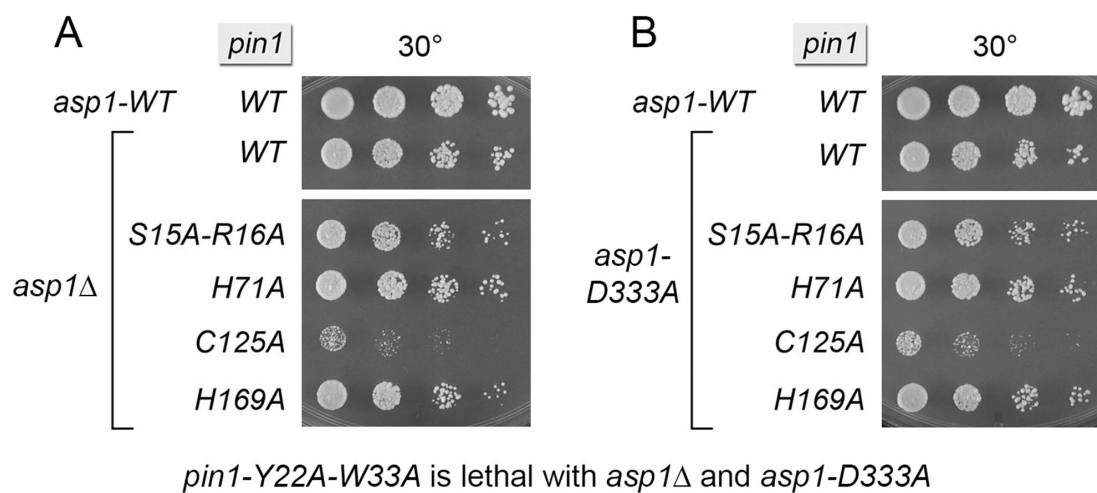

Figure S3. Activity of Pin1-Ala mutants in *asp1*Δ and *asp1*-D333A backgrounds. *S. pombe* strains bearing the indicated *pin1* alleles in combination with *asp1*Δ (panel A) or *asp1*-D333A (panel B) were spot-tested for growth on YES agar at 30°C. As noted at bottom, *pin1*-Y22A-W33A was lethal in the *asp1*Δ and *asp1*-D333A backgrounds.

| Sample            | Total Paired Reads | Mapped Reads     |
|-------------------|--------------------|------------------|
| <i>WT</i> (1)     | 21,449,706         | 20,980,488 (98%) |
| <i>WT</i> (2)     | 23,888,710         | 23,365,656 (98%) |
| <i>WT</i> (3)     | 22,670,827         | 22,083,962 (97%) |
| <i>pin1</i> Δ (1) | 21,813,736         | 21,296,390 (98%) |
| <i>pin1</i> Δ (2) | 22,583,876         | 22,028,306 (98%) |
| <i>pin1</i> Δ (3) | 21,273,120         | 20,762,723 (98%) |

Figure S4. RNA-seq read counts for triplicate biological replicates.

| Sample Pairs             | Pearson Coefficient |
|--------------------------|---------------------|
| <i>WT</i> (1) vs (2)     | 0.976               |
| <i>WT</i> (1) vs (3)     | 0.978               |
| <i>WT</i> (2) vs (3)     | 0.987               |
| <i>pin1</i> Δ (1) vs (2) | 0.984               |
| <i>pin1</i> Δ (1) vs (3) | 0.984               |
| <i>pin1</i> Δ (2) vs (3) | 0.984               |

Figure S5. RNA-seq data reproducibility between biological replicates.

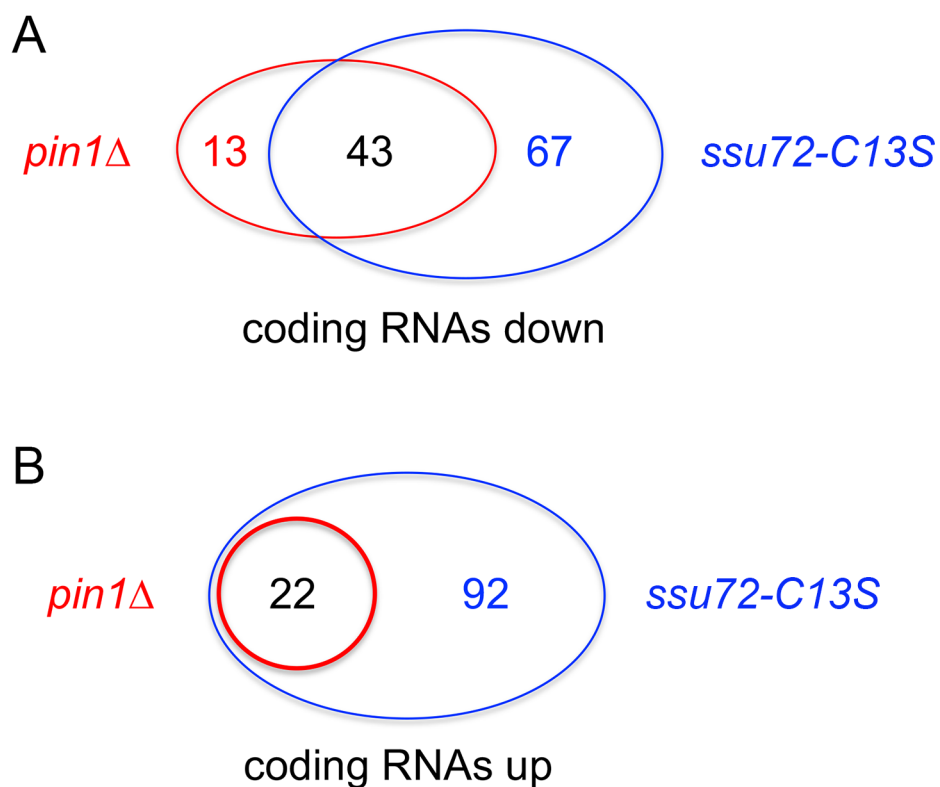

Figure S6. Overlapping transcriptional signatures of *pin1*Δ and *ssu72-C13S*. Venn diagrams specify the numbers of protein-coding poly(A)<sup>+</sup> transcripts that were significantly down-regulated by at least twofold (A) or significantly up-regulated by at least twofold (B) in the *pin1*Δ and *ssu72-C13S* strains.

| gene         | log2 change |
|--------------|-------------|
| <i>pho1</i>  | -4.37       |
| <i>pho84</i> | -3.83       |
| <i>mei2</i>  | -2.89       |
| <i>ecl3</i>  | -2.21       |
| <i>grt1</i>  | -1.91       |
| <i>dak2</i>  | -1.67       |
| <i>mfm2</i>  | -1.47       |
| <i>spk1</i>  | -1.45       |
| <i>map1</i>  | -1.44       |
| <i>isp4</i>  | -1.38       |
| SPAC56F8.15  | -1.34       |
| SPAPJ695.02  | -1.32       |
| SPAC18G6.12c | -1.29       |
| <i>tspO</i>  | -1.21       |
| <i>ste11</i> | -1.14       |
| <i>nde2</i>  | -1.13       |
| <i>abp2</i>  | -1.11       |
| <i>anc1</i>  | -1.10       |
| <i>mam2</i>  | -1.10       |
| <i>wdr83</i> | -1.05       |
| SPAC2H10.01  | -1.03       |
| SPAC23H3.15c | 4.24        |
| SPAC750.01   | 3.56        |
| <i>str1</i>  | 3.46        |
| <i>frp1</i>  | 2.63        |
| <i>srx1</i>  | 2.59        |
| SPAC11D3.01c | 2.27        |
| SPCC794.03   | 2.18        |
| <i>fio1</i>  | 2.03        |
| SPAC27D7.09c | 1.89        |
| <i>gnr1</i>  | 1.80        |
| <i>fip1</i>  | 1.55        |
| <i>pof14</i> | 1.48        |
| SPCC569.09   | 1.45        |
| SPAC25B8.12c | 1.23        |
| <i>bfr1</i>  | 1.03        |

Figure S7. Overlapping transcriptional signatures of *pin1*Δ and *asp1-D333A*. Lists of: (i) 21 annotated protein-coding genes that were down-regulated at least two-fold in *asp1-D333A* cells that were also down-regulated in *pin1*Δ cells; and (ii) 15 protein-coding genes that were up-regulated at least two-fold in *asp1-D333A* cells that were also up-regulated in *pin1*Δ cells. The log2 fold changes in *asp1-D333A* versus wild-type are shown. The gene functions are listed in Figures 10 and 11.
